# Supplementary material
Source: Elsevier journal article supplement (https://www.sciencedirect.com/science/article/pii/S2530064419300525)
Supplement: mmc1 [file S2530064419300525:mmc1.docx]

Fire drives abandoned pastures to a savanna-like state in the Brazilian Atlantic Forest

**Appendix A and B:**

Supplementary data associated with this article can be found at:

**Supplementary data:**

**Appendix A**: Relative abundance of species in both layers (overstory and understory) in burned sites with different fire frequency (Hi: High frequency; In: Intermediate frequency; Lo: Low frequency) and 15 most abundant species in Old growth forest (Og). Vegetation type: RF: Rainforest; DF: Deciduous forest; MF: Mixed forest; RW: Rocky woodland; SW: Savanna woodland; RiF: Riverine forest; SF: Seasonal floodplain; SC: Sandy coastal vegetation; Occurrence: biogeographical distribution of species: AF: Atlantic Forest; cer.: cerrado (Brazilian savanna); Source: Flora do Brasil: floradobrasil.jbrj.gov.br

|  |  |  | **Areas** | | | | | | | | | |  |  |  |
| --- | --- | --- | --- | --- | --- | --- | --- | --- | --- | --- | --- | --- | --- | --- | --- |
| **Family / Species** |  | **Hi** | |  | **In** | |  | **Lo** | |  | **Og** | |  | **Vegetation type** | **Occurrence** |
|  |  | **Ov.** | **Un.** |  | **Ov.** | **Un.** |  | **Ov.** | **Un.** |  | **Ov.** | **Un.** |  |
| **Anacardiaceae** |  |  |  |  |  |  |  |  |  |  |  |  |  |  |  |
| *Schinus terebinthifolius* Raddi |  | 0 | 0 |  | 0 | 0 |  | 0,4 | 1,1 |  | 0 | 0 |  | RF; DF; SW; SF; SC | AF; cer. |
| **Annonaceae** |  |  |  |  |  |  |  |  |  |  |  |  |  |  |  |
| *Xylopia sericea* A. St.-Hil. |  | 0 | 0 |  | 0 | 0 |  | 0,4 | 1,1 |  | 0 | 0 |  | RF; RiF; DF; SW | AF; cer. |
| *Duguetia sessilis* (Vell.) Maas |  | 0 | 0 |  | 0 | 0 |  | 0 | 0 |  | 1,8 | 6,7 |  | RF; SC | AF |
| **Apocynaceae** |  |  |  |  |  |  |  |  |  |  |  |  |  |  |  |
| *Himatanthus bracteatus* (A. DC.) Woodson |  | 0 | 0 |  | 0,5 | 0 |  | 0 | 0 |  | 0 | 0 |  | RF; DF | AF |
| **Arecaceae** |  |  |  |  |  |  |  |  |  |  |  |  |  |  |  |
| *Attalea humilis* Mart. |  | 0 | 0 |  | 0 | 0 |  | 0,4 | 0 |  | 3,2 | 3 |  | RF; SC | AF |
| *Astrocaryum aculeatissimum* (Schott) Burret |  | 0 | 0 |  | 0 | 0 |  | 0 | 0 |  | 5,2 | 6 |  | RF | AF |
| **Asteraceae** |  |  |  |  |  |  |  |  |  |  |  |  |  |  |  |
| *Baccharis dracunculifolia* DC. |  | 0 | 0 |  | 0 | 0 |  | 1,8 | 2,2 |  | 0 | 0 |  | RF; DF; SW; SF; RW;SC; | AF; cer. |
| *Moquiniastrum polymorphum* (Less.) G.Sancho |  | 98,2 | 76,9 |  | 95,8 | 54,4 |  | 86,4 | 14 |  | 0 | 0 |  | MF; DF; RW; SW; RiF | AF; cer. |
| **Bignoniaceae** |  |  |  |  |  |  |  |  |  |  |  |  |  |  |  |
| *Cybistax antisyphilitica* (Mart.) Mart. |  | 0,9 | 7,7 |  | 0 | 0 |  | 0 | 1,1 |  | 0 | 0 |  | MF; DF; RW; SW; RiF | AF; cer. |
| *Adenocalymma subsessilifolium* DC. |  | 0 | 0 |  | 0 | 0 |  | 0 | 0 |  | 0 | 18,7 |  | RF; DF | AF |
| **Boraginaceae** |  |  |  |  |  |  |  |  |  |  |  |  |  |  |  |
| *Cordia trichoclada* DC. |  | 0 | 0 |  | 0 | 2,6 |  | 0 | 0 |  | 0 | 0 |  | RF; | AF |
| **Celastraceae** |  |  |  |  |  |  |  |  |  |  |  |  |  |  |  |
| *Maytenus samyedaformis* Reiss. |  | 0 | 0 |  | 0 | 0 |  | 0 | 0 |  | 0 | 0 |  | RF | AF |
| **Erythroxylaceae** |  |  |  |  |  |  |  |  |  |  |  |  |  |  |  |
| *Erythroxylum pulchrum* A. St.-Hil. |  | 0 | 0 |  | 0 | 0 |  | 0 | 1,1 |  | 0 | 0 |  | RF; DF; SC | AF |
| **Euphorbiaceae** |  |  |  |  |  |  |  |  |  |  |  |  |  |  |  |
| *Actinostemon verticillatus* (Klotzsch) Baill. |  | 0 | 0 |  | 0 | 0 |  | 0 | 0 |  | 3,9 | 0 |  | RF | AF |
| *Mabea fistulifera* Mart. |  | 0 | 0 |  | 0 | 0 |  | 0 | 0 |  | 8,8 | 0 |  | RF; DF; SW; SF; RW | AF; cer. |
| *Senefeldera verticillata* (Vell.) Croizat |  | 0 | 0 |  | 0 | 0 |  | 0 | 0 |  | 10,9 | 0 |  | RF | AF |
| **Fabaceae** |  |  |  |  |  |  |  |  |  |  |  |  |  |  |  |
| *Inga laurina* (Sw.) Willd. |  | 0 | 0 |  | 0 | 0 |  | 1,1 | 0 |  | 0 | 0 |  | RF; DF; SW; RiF; SC | AF; cer. |
| *Stryphnodendron pulcherrimum* (Willd.) Hochr. |  | 0 | 0 |  | 0 | 0 |  | 0,4 | 0 |  | 0 | 0 |  | RF; DF; SW; RiF; SC | AF; cer. |
| **Lamiaceae** |  |  |  |  |  |  |  |  |  |  |  |  |  |  |  |
| *Vitex polygama* Cham. |  | 0 | 0 |  | 0 | 0 |  | 0 | 1,1 |  | 0 | 0 |  | RF; DF; SW; RiF; SC | AF; cer. |
| **Lauraceae** |  |  |  |  |  |  |  |  |  |  |  |  |  |  |  |
| *Nectandra reticulata* (Ruiz & Pav.) Mez |  | 0 | 0 |  | 0 | 0 |  | 0,7 | 1,1 |  | 0 | 0 |  | RF; DF; SW | AF; cer. |
| **Melastomataceae** |  |  |  |  |  |  |  |  |  |  |  |  |  |  |  |
| *Miconia albicans* (Sw.) Triana |  | 0 | 0 |  | 2,1 | 29,8 |  | 0 | 31,2 |  | 0 | 0 |  | RW; SW; SF | AF; cer. |
| *Miconia cinnamomifolia* (DC.) Naudin |  | 0 | 0 |  | 0 | 0 |  | 3,9 | 14,2 |  | 0 | 0 |  | RF | AF |
| **Meliacae** |  |  |  |  |  |  |  |  |  |  |  |  |  |  |  |
| *Guarea guidonia* (L.) Sleumer |  | 0 | 0 |  | 0 | 0 |  | 1,4 | 2,2 |  | 0 | 0 |  | RF; DF; RiF | AF; cer. |
| **Moraceae** |  |  |  |  |  |  |  |  |  |  |  |  |  |  |  |
| *Brosimum guianense* (Aubl.) Huber |  | 0 | 0 |  | 0 | 0 |  | 0,4 | 0 |  | 1,4 | 0 |  | RF; DF; MF; SW; RiF | AF; cer. |
| *Helicostylis tomentosa* (Poepp. & Endl.) Rusby |  | 0 | 0 |  | 0 | 0 |  | 0 | 0 |  | 0 | 3,7 |  | RF; RiF | AF |
| **Myrtaceae** |  |  |  |  |  |  |  |  |  |  |  |  |  |  |  |
| *Myrcia anceps* (Spreng.) O. Berg |  | 0 | 0 |  | 0,5 | 0 |  | 0 | 0 |  | 0 | 0 |  | RF; RW | AF; cer. |
| *Myrcia splendens* (Sw.) DC. |  | 0,9 | 0 |  | 0 | 0,9 |  | 1,4 | 0 |  | 0 | 0 |  | RF; DF; RW; SW; RiF; SC | AF; cer. |
| *Psidium guineense* Sw. |  | 0 | 15,4 |  | 0 | 8,8 |  | 0 | 1,1 |  | 0 | 0 |  | RF; DF; RW; SW; RiF; SC | AF; cer. |
| *Syzygium cumini* (L.) Skeels |  | 0 | 0 |  | 0 | 1,8 |  | 0 | 0 |  | 0 | 0 |  | RF; DF; RiF | AF; |
| **Olacaceae** |  |  |  |  |  |  |  |  |  |  |  |  |  |  |  |
| *Tetrastylidium grandifolium* (Baill.) Sleumer |  | 0 | 0 |  | 0 | 0 |  | 0 | 0 |  | 1,8 | 2,2 |  | RF | AF |
| **Peraceae** |  |  |  |  |  |  |  |  |  |  |  |  |  |  |  |
| *Pera glabrata* (Schott) Poepp. ex Baill. |  | 0 | 0 |  | 0,5 | 0 |  | 0 | 0 |  | 0 | 0 |  | RF; DF; SW; SF; RW;SC; | AF; cer. |
| **Primulaceae** |  |  |  |  |  |  |  |  |  |  |  |  |  |  |  |
| *Myrsine coriacea* (Sw.) R. Br. ex Roem. & Schult. |  | 0 | 0 |  | 0 | 0 |  | 1,1 | 5,4 |  | 0 | 0 |  | RF; DF; SF;SC; | AF; cer. |
| **Rubiaceae** |  |  |  |  |  |  |  |  |  |  |  |  |  |  |  |
| *Bathysa mendoncaei* K. Schum. |  | 0 | 0 |  | 0 | 0 |  | 0 | 0 |  | 0 | 5,2 |  | RF | AF |
| *Faramea multiflora* A. Rich. ex DC. |  | 0 | 0 |  | 0 | 0 |  | 0 | 0 |  | 0 | 6 |  | RF; SW; SF; RiF | AF; cer. |
| **Salicaceae** |  |  |  |  |  |  |  |  |  |  |  |  |  |  |  |
| *Casearia sylvestris* Sw. |  | 0 | 0 |  | 0 | 0 |  | 1,4 | 1,1 |  | 0 | 0 |  | RF; DF; SW; SF; RW;SC; | AF; cer. |
| **Sapotaceae** |  |  |  |  |  |  |  |  |  |  |  |  |  |  |  |
| *Micropholis crassipedicellata* (Mart. & Eichler ex Miq.) Pierre |  | 0 | 0 |  | 0 | 0 |  | 0 | 0 |  | 1,8 | 0 |  | RF | AF |
| **Siparunaceae** |  |  |  |  |  |  |  |  |  |  |  |  |  |  |  |
| *Siparuna guianensis* Aubl. |  | 0 | 0 |  | 0,5 | 0 |  | 0 | 15 |  | 0 | 0 |  | RF; SF; RiF | AF; cer. |
| *Siparuna reginae* (Tul.) A. DC. |  | 0 | 0 |  | 0 | 0 |  | 0 | 0 |  | 3,2 | 0 |  | RF; DF; SF | AF; cer. |
| **Solanaceae** |  |  |  |  |  |  |  |  |  |  |  |  |  |  |  |
| *Solanum swartzianum* Roem & Schultz |  | 0 | 0 |  | 0 | 0 |  | 0 | 2,2 |  | 0 | 0 |  | RF; SF; SW; RiF; RW | AF; cer. |
| **Urticaceae** |  |  |  |  |  |  |  |  |  |  |  |  |  |  |  |
| *Cecropia pachystachya* Trécul |  | 0 | 0 |  | 0 | 0 |  | 0,4 | 2,2 |  | 0 | 0 |  | RF; SF; SW; RiF; RW | AF; cer. |
| **Violaceae** |  |  |  |  |  |  |  |  |  |  |  |  |  |  |  |
| *Rinorea guianensis* Aubl. |  | 0 | 0 |  | 0 | 0 |  | 0 | 0 |  | 0,4 | 3,7 |  | RF; DF; RiF | AF |

**Appendix B:** Bark thickness and regional potential height in of species observed in the area.

(--) Not available.

| **Species** | **Family** | **% twig bark thickness radius** | | **Potential Height (m)** | |
| --- | --- | --- | --- | --- | --- |
| *Schinus terebinthifolius* Raddi | ANACARDIACEAE | 15.60 | 7 | |
| *Duguetia sessilis* (Vell.) Maas | ANNONACEAE | 15.62 | 8 | |
| *Guatteria campestris* R.E.Fr | ANNONACEAE | 18.01 | 17 | |
| *Guatteria candolleana* Schltdl. | ANNONACEAE | 14.65 | 7 | |
| *Annona dolabripetala* (Raddi) R.E.Fr. | ANNONACEAE | 12.76 | 11 | |
| *Annona sylvatica* (A.St.-Hil.) Mart. | ANNONACEAE | 9.75 | 10 | |
| *Xylopia sericea* A. St.-Hil. | ANNONACEAE | 22.59 | 20 | |
| *Himatanthus bracteatus* (A. DC.) Woodson | APOCYNACEAE | 7.00 | 13 | |
| *Rauvolfia grandiflora* Mart. Ex A. DC. | APOCYNACEAE | 6.78 | 5 | |
| *Baccharis dracunculifolia* DC. | ASTERACEAE | -- | 3 | |
| *Moquiniastrum polymorphum* (Less.) G.Sancho | ASTERACEAE | 21.91 | 8 | |
| *Adenocalymma subsessilifolium* DC. | BIGNONIACEAE | 9.98 | 4 | |
| *Cybistax antisyphilitica* (Mart.) Mart. | BIGNONIACEAE | 16.49 | 10 | |
| *Cordia trichoclada* DC. | BORAGINACEAE | 10.91 | 10 | |
| *Protium* sp. 1 | BURSERACEAE | -- | 20 | |
| *Protium widgrenii* Engl. | BURSERACEAE | 9.94 | 20 | |
| *Maytenus longifolia* Reissek | CELASTRACEAE | 11.59 | 9 | |
| *Maytenus samyedaformis* Reiss. | CELASTRACEAE | 7.44 | 9 | |
| *Salacia* sp. 1 | CELASTRACEAE | -- | 6 | |
| Chrysobalanaceae sp. 2 | CHRYSOBALANACEAE | 8.44 | -- | |
| *Couepia venosa* Prance | CHRYSOBALANACEAE | 16.19 | 15 | |
| *Garcinia gardneriana* (Planch. & Triana) Zappi | CLUSIACEAE | 10.64 | 10 | |
| *Tovomita paniculata* (Spreng.) Cambess. | CLUSIACEAE | 16.51 | 5 | |
| *Erythroxylum citrifolium* A. St.-Hil. | ERYTHROXYLACEAE | 11.81 | 6 | |
| *Erythroxylum cuspidifolium* Mart. | ERYTHROXYLACEAE | 11.19 | 6 | |
| *Erythroxylum pulchrum* A. St.-Hil. | ERYTHROXYLACEAE | -- | 10 | |
| *Actinostemon verticillatus* (Klotzsch) Baill. | EUPHORBIACEAE | 9.11 | 8 | |
| Euphorbiaceae sp. 1 | EUPHORBIACEAE | 14.01 | -- | |
| *Mabea fistulifera* Mart. | EUPHORBIACEAE | 10.14 | 20 | |
| *Sagotia racemosa* Baill. | EUPHORBIACEAE | 5.05 | 15 | |
| *Senefeldera verticillata* (Vell.) Croizat | EUPHORBIACEAE | 8.63 | 14 | |
| *Apuleia leiocarpa* (Vogel) J.F. Macbr. | FABACEAE | 15.05 | 20 | |
| *Copaifera langsdorffii* Desf. | FABACEAE | 14.82 | 25 | |
| *Hymenolobium janeirense* (Kulmann) H.C. Lima | FABACEAE | 14.57 | 20 | |
| *Inga laurina* (Sw.) Willd. | FABACEAE | 10.21 | 12 | |
| *Inga* sp. 1 | FABACEAE | 17.55 | -- | |
| *Inga striata* Benth. | FABACEAE | -- | 16 | |
| *Plathymenia reticulata* Benth. | FABACEAE | 8.00 | 25 | |
| *Poecilanthe falcata* (Vell.) Heringer | FABACEAE | 10.39 | 20 | |
| *Stryphnodendron pulcherrimum* (Willd.) Hochr. | FABACEAE | 16.02 | 18 | |
| *Swartzia apetala* Raddi | FABACEAE | 10.07 | 10 | |
| *Tachigali pilgeriana* (Harms) L.G. Silva | FABACEAE | 10.83 | 18 | |
| *Zollernia glabra* (Spreng.) Yakovlev | FABACEAE | 4.01 | 15 | |
| *Vitex polygama* Cham. | LAMIACEAE | 20.44 | 6 | |
| *Cryptocarya moschata* Nees & C. Mart. | LAURACEAE | 13.00 | 20 | |
| *Cryptocarya saligna* Mez | LAURACEAE | -- | 20 | |
| *Licaria armeniaca* (Nees) Kosterm. | LAURACEAE | -- | 15 | |
| *Licaria bahiana* Kurz | LAURACEAE | 6.00 | 15 | |
| *Licaria guianensis* Aubl. | LAURACEAE | 19.07 | 18 | |
| *Nectandra nitidula* Nees & Mart. | LAURACEAE | 10.35 | 10 | |
| *Nectandra oppositifolia* Nees & Mart. | LAURACEAE | 12.36 | 15 | |
| *Nectandra reticulata* (Ruiz & Pav.) Mez | LAURACEAE | 14.14 | 8 | |
| *Ocotea divaricata* (Nees) Mez | LAURACEAE | 9.50 | 15 | |
| *Ocotea laxa* (Nees) Mez | LAURACEAE | 7.73 | 15 | |
| *Ocotea odorifera* (Vell.) Rohwer | LAURACEAE | 3.13 | 18 | |
| *Ocotea schottii* (Meissn.) Mez. | LAURACEAE | 13.57 | 12 | |
| *Rhodostemonodaphne macrocalyx* (Meisn.) | LAURACEAE | 10.79 | 16 | |
| *Urbanodendron bahiense* (Meisn.) Rohwer | LAURACEAE | 9.64 | 18 | |
| *Urbanodendron verrucosum* (Nees) Mez | LAURACEAE | 5.86 | 12 | |
| Lecythidaceae sp. 1 | LECYTHIDACEAE | 15.78 | -- | |
| *Eriotheca pentaphylla* (Vell.) A. Robyns | MALVACEAE | -- | 30 | |
| *Pseudobombax grandiflorum* (Cav.) A. Robyns | MALVACEAE | 16.37 | 25 | |
| *Quararibea turbinata* (Sw.) Poir. | MALVACEAE | 11.38 | 7 | |
| *Miconia albicans* (Sw.) Triana | MELASTOMATACEAE | 15.16 | 3 | |
| *Miconia cinnamomifolia* (DC.) Naudin | MELASTOMATACEAE | 14.33 | 15 | |
| *Miconia lepidota* Schrank & Mart. ex DC. | MELASTOMATACEAE | 7.99 | 17 | |
| *Miconia* sp. 1 | MELASTOMATACEAE | 9.35 | -- | |
| *Cabralea canjerana* (Vell.) Mart. | MELIACEAE | 21.89 | 15 | |
| *Guarea guidonia* (L.) Sleumer | MELIACEAE | 7.46 | 11 | |
| *Guarea macrophylla* Vahl | MELIACEAE | 10.93 | 12 | |
| *Trichilia martiana* C. DC. | MELIACEAE | 7.15 | 8 | |
| *Trichilia tomentosa* Harms. | MELIACEAE | -- | 22 | |
| *Macrotorus utriculatus* Perkins | MONIMIACEAE | 8.34 | 7 | |
| *Mollinedia glabra* (Spreng.) Perk. | MONIMIACEAE | 4.41 | 5 | |
| *Mollinedia schottiana* (Spreng.) Perkins | MONIMIACEAE | 8.00 | 5 | |
| *Brosimum glaziovii* Taub. | MORACEAE | 12.79 | 15 | |
| *Brosimum guianense* (Aubl.) Huber | MORACEAE | 12.18 | 18 | |
| *Helicostylis tomentosa* (Poepp. & Endl.) Rusby | MORACEAE | 8.64 | 15 | |
| *Naucleopsis oblongifolia* (Kuhlm.) Carauta | MORACEAE | 8.39 | 20 | |
| *Sorocea guilleminiana* Gaudich. | MORACEAE | 9.71 | 10 | |
| *Virola bicuhyba* (Schott ex Spreng.) Warb. | MYRISTICACEAE | 11.01 | 25 | |
| *Calyptranthes lucida* Mart. ex DC. | MYRTACEAE | 10.96 | 15 | |
| *Eugenia candolleana* DC. | MYRTACEAE | 8.23 | 10 | |
| *Eugenia excelsa* O Berg. | MYRTACEAE | 17.34 | 12 | |
| *Eugenia macahensis* O. Berg | MYRTACEAE | 14.53 | 9 | |
| *Eugenia magnifica* Spring | MYRTACEAE | -- | 20 | |
| *Eugenia microcarpa* O. Berg | MYRTACEAE | 13.61 | 12 | |
| *Eugenia oblongata* O. Berg | MYRTACEAE | 14.94 | 18 | |
| *Eugenia pisiformis* Cambess. | MYRTACEAE | -- | 8 | |
| *Eugenia* sp. 4 | MYRTACEAE | 13.72 | -- | |
| *Eugenia subundulata* Kiaersk. | MYRTACEAE | 13.07 | 8 | |
| *Gomidesia crocea* Nied. | MYRTACEAE | 14.61 | 12 | |
| *Marlierea tomentosa* Cambess. | MYRTACEAE | 16.12 | 12 | |
| *Marlierea tomentosa* Cambess. | MYRTACEAE | 16.12 | 12 | |
| *Myrcia anceps* (Spreng.) O. Berg | MYRTACEAE | 17.07 | 12 | |
| *Myrcia splendens* (Sw.) DC. | MYRTACEAE | 11.17 | 12 | |
| Myrtaceae sp. 1 | MYRTACEAE | 11.39 | -- | |
| *Psidium guineense* Sw. | MYRTACEAE | 7.28 | 3 | |
| *Syzygium cumini* (L.) Skeels | MYRTACEAE | 16.69 | 10 | |
| *Guapira areolata* (Heimerl) Lundell | NYCTAGINACEAE | 3.99 | 11 | |
| *Guapira nitida* (Schmidt) Lundell | NYCTAGINACEAE | 10.84 | 8 | |
| *Guapira opposita* (Vell.) Reitz. | NYCTAGINACEAE | 9.10 | 15 | |
| *Tetrastylidium grandifolium* (Baill.) Sleumer | OLACACEAE | 8.75 | 18 | |
| *Pera glabrata* (Schott) Poepp. ex Baill. | PERACEAE | 9.65 | 20 | |
| *Hyeronima oblonga* (Tul.) Müll. Arg. | PHYLLANTACEAE | 12.91 | 11 | |
| *Cybianthus* sp. 1 | PRIMULACEAE | 7.60 | 5 | |
| *Myrsine coriacea* (Sw.) R. Br. ex Roem. & Schult. | PRIMULACEAE | 12.40 | 15 | |
| *Roupala brasiliensis* Klotzsch | PROTEACEAE | 10.83 | 9 | |
| *Bathysa mendoncaei* K. Schum. | RUBIACEAE | 10.86 | 11 | |
| *Coussarea contracta* (Walp.) Müll. Arg. | RUBIACEAE | 13.58 | 8 | |
| *Faramea multiflora* A. Rich. ex DC. | RUBIACEAE | 8.21 | 7 | |
| *Psychotria vellosiana* Benth. | RUBIACEAE | 7.25 | 10 | |
| Rubiaceae sp. 3 | RUBIACEAE | 12.45 | -- | |
| Rubiaceae sp. 5 | RUBIACEAE | 10.83 | -- | |
| *Casearia sylvestris* Sw. | SALICACEAE | 11.30 | 11 | |
| *Cupania furfuracea* Radlk. | SAPINDACEAE | 15.37 | 18 | |
| *Cupania oblongifolia* Mart. | SAPINDACEAE | 8.40 | 12 | |
| *Cupania racemosa* (Vell.) Radlk. | SAPINDACEAE | 9.37 | 11 | |
| *Cupania schizoneura* Radlk. | SAPINDACEAE | 14.37 | 10 | |
| *Ecclinusa ramiflora* Mart. | SAPOTACEAE | 20.53 | 15 | |
| *Micropholis crassipedicellata* (Mart. & Eichler ex Miq.) Pierre | SAPOTACEAE | 14.73 | 16 | |
| *Micropholis gardneriana* (A. DC.) Pierre | SAPOTACEAE | 9.60 | 10 | |
| *Pouteria bangii* (Rusby) T.D. Penn. | SAPOTACEAE | 10.94 | 20 | |
| *Pouteria bullata* (S.Moore) Baehni | SAPOTACEAE | 9.01 | 20 | |
| *Pouteria caimito* (Ruiz & Pav.) Radlk. | SAPOTACEAE | 13.97 | 20 | |
| *Pouteria* sp. 1 | SAPOTACEAE | 10.70 | -- | |
| *Pradosia lactescens* (Vell.) Radlk. | SAPOTACEAE | 21.33 | 18 | |
| Sapotaceae sp. 1 | SAPOTACEAE | 8.20 | -- | |
| Sapotaceae sp. 2 | SAPOTACEAE | 9.40 | -- | |
| Sapotaceae sp. 5 | SAPOTACEAE | 12.33 | -- | |
| Sapotaceae sp. 6 | SAPOTACEAE | 12.33 | -- | |
| *Sarcaulus brasiliensis* (A. DC.) Eyma | SAPOTACEAE | 4.29 | 10 | |
| *Simarouba amara* Aubl. | SIMAROUBACEAE | 12.16 | 22 | |
| *Siparuna guianensis* Aubl. | SIPARUNACEAE | 7.41 | 5 | |
| *Siparuna reginae* (Tul.) A. DC. | SIPARUNACEAE | 11.85 | 12 | |
| *Solanum swartzianum* Roem & Schultz | SOLANACEAE | 10.76 | 8 | |
| *Cecropia pachystachya* Trécul | URTICACEAE | -- | 8 | |
| *Pourouma guianensis* Aubl. | URTICACEAE | 7.61 | 15 | |
| *Rinorea guianensis* Aubl. | VIOLACEAE | 9.01 | 12 | |
| Indet. 10* |  | 10.42 | -- | |
| Indet. 11* |  | 11.33 | -- | |
| Indet. 255* |  | 16.76 | -- | |

***** Unidentified species
